# Supplementary material for: On the intrinsic curvature of animal whiskers
Source: PubMed Central journal article supplement (PMC9821693; doi:10.1371/journal.pone.0269210), 2023-01-06
Supplement: pone.0269210.s002.pdf [file pone.0269210.s002.pdf]

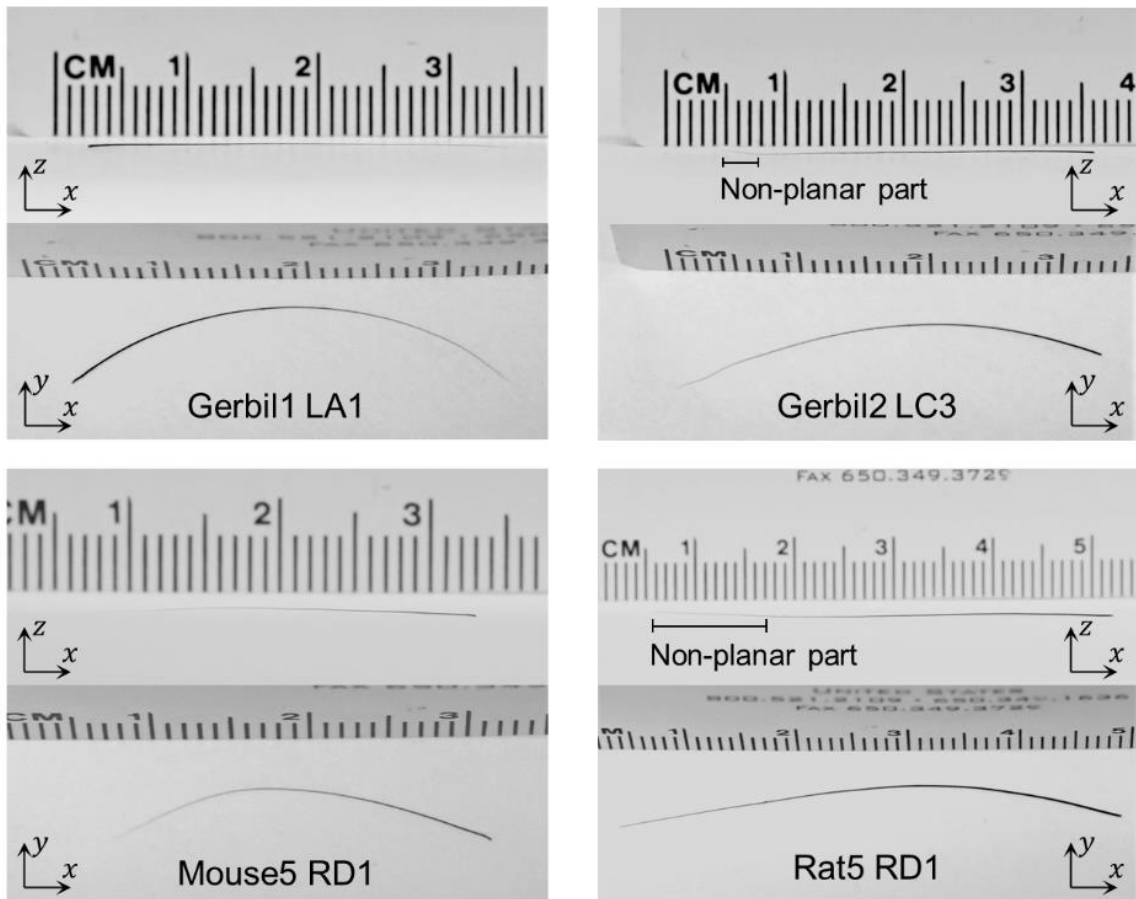

**S2 Fig. Examples of planar and non-planar whiskers.** Each panel shows the front view (top) and birds-eye view (bottom) of a whisker. The whisker tips are only slightly out of the plane, which has almost no effect on its 2D projection. No twist is observed in any of the whisker shape.
