# Supplementary material for: On the intrinsic curvature of animal whiskers
Source: PubMed Central journal article supplement (PMC9821693; doi:10.1371/journal.pone.0269210), 2023-01-06
Supplement: pone.0269210.s005.pdf [file pone.0269210.s005.pdf]

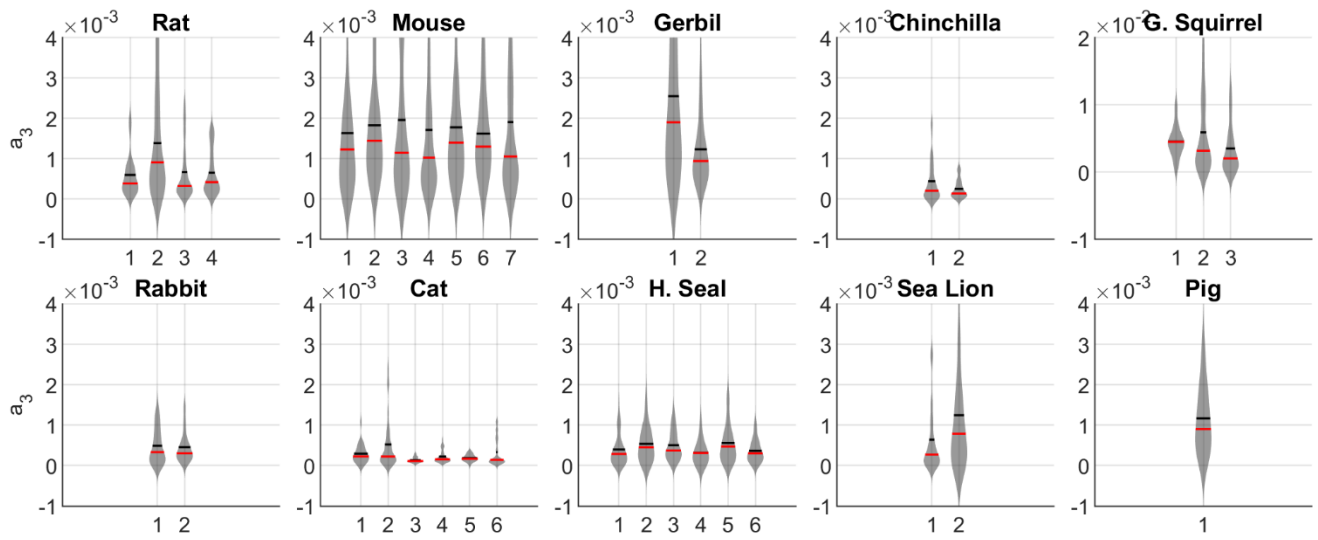

**S5 Fig. Individual variation in the polynomial model  $y=a_3x^3$ .** The optimized model coefficients  $a_3$  for each whisker are plotted as violin plots grouped by individual animals. Plotting conventions are identical to S4 Fig.
