# Supplementary material for: On the intrinsic curvature of animal whiskers
Source: PubMed Central journal article supplement (PMC9821693; doi:10.1371/journal.pone.0269210), 2023-01-06
Supplement: pone.0269210.s006.pdf [file pone.0269210.s006.pdf]

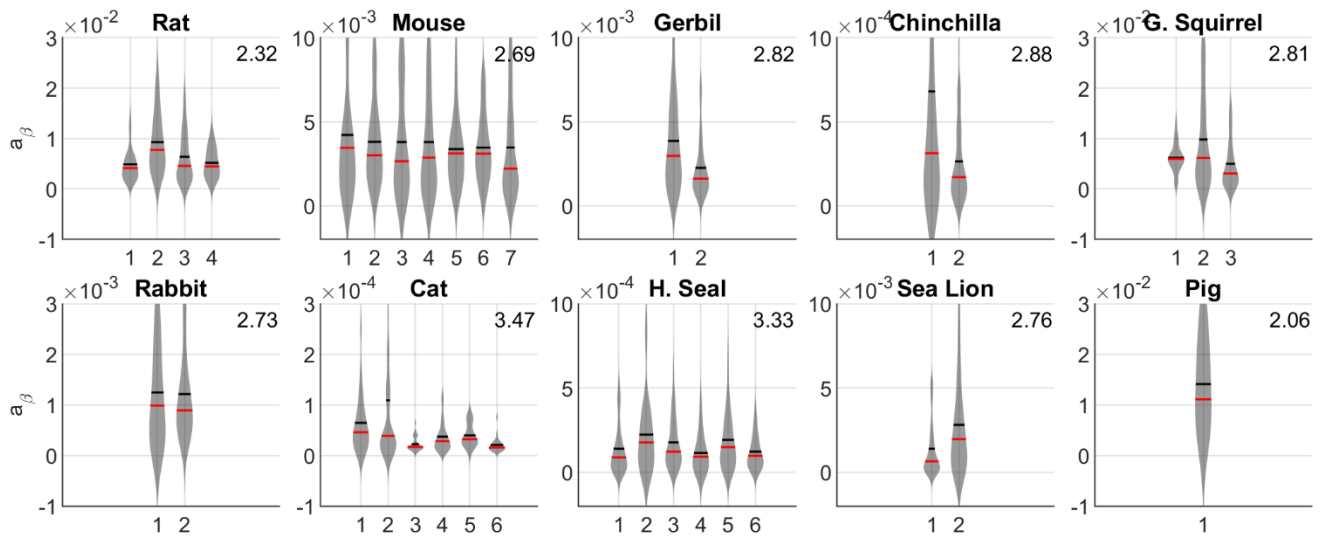

**S6 Fig. Individual variation in the fractional exponent model  $y=a_\beta x^\beta$ .** The optimized model coefficients  $a_\beta$  for each whisker are plotted as violin plots grouped by individual animals. It is important to keep in mind that each subplot (i.e., each species) uses a different value of  $\beta$  (top right corner). Plotting conventions are identical to S4 Fig.
