# Supplementary material for: On the intrinsic curvature of animal whiskers
Source: PubMed Central journal article supplement (PMC9821693; doi:10.1371/journal.pone.0269210), 2023-01-06
Supplement: pone.0269210.s008.pdf [file pone.0269210.s008.pdf]

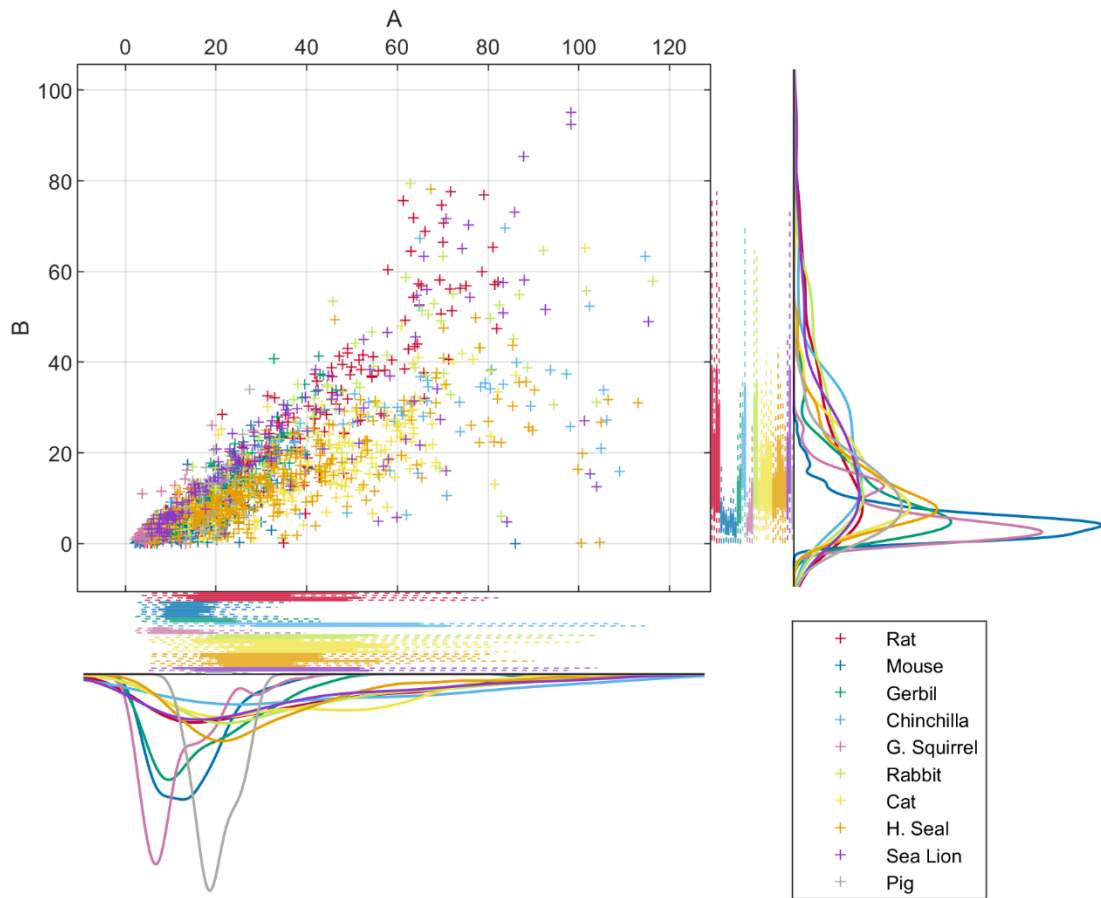

**S8 Fig. Individual variation in the elliptical model.** The optimized coefficients for the elliptical model, A and B, are presented in a 2D scatter plot. Plotting conventions are identical to S7 Fig.
