# Supplementary material for: On the intrinsic curvature of animal whiskers
Source: PubMed Central journal article supplement (PMC9821693; doi:10.1371/journal.pone.0269210), 2023-01-06
Supplement: pone.0269210.s009.pdf [file pone.0269210.s009.pdf]

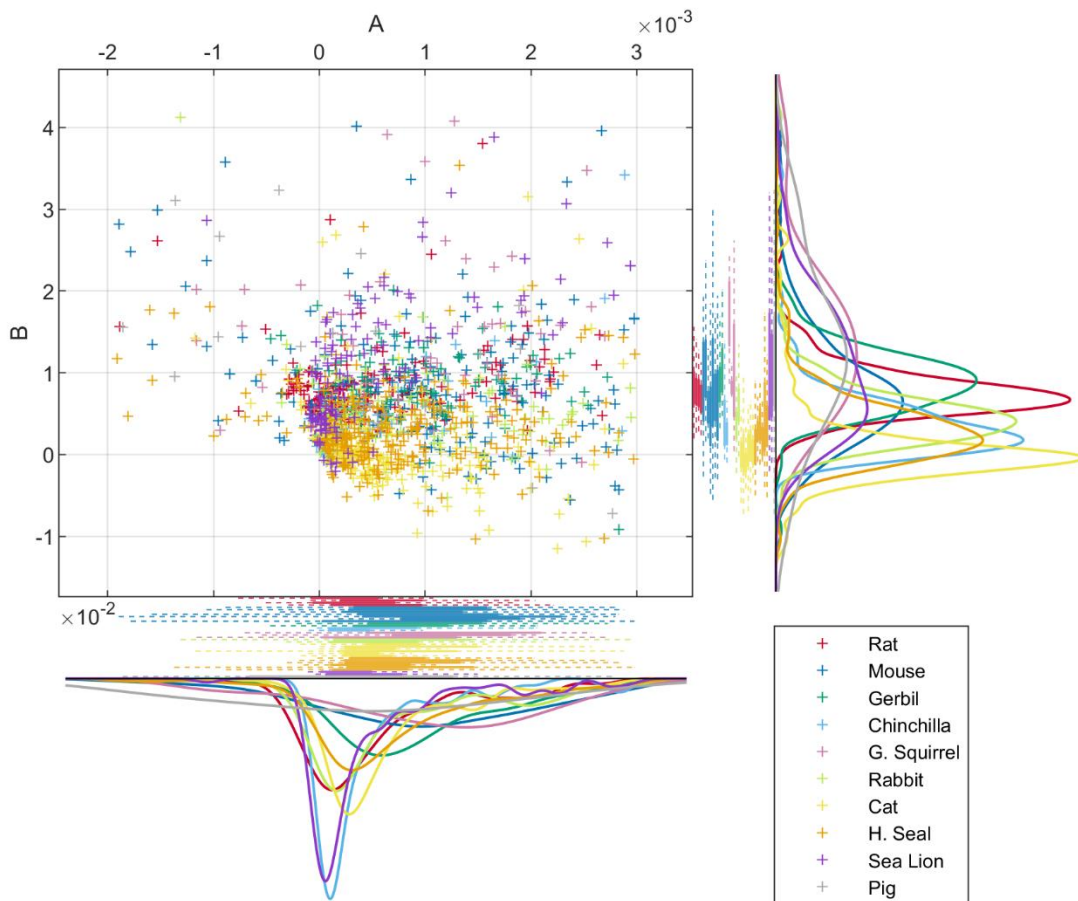

**S9 Fig. Individual variation in the linear Cesàro model.** The optimized coefficients  $A$  and  $B$  in the linear Cesàro equation  $\kappa(s)=As+B$ , are presented in a 2D scatter plot. Plotting conventions are identical to S7 Fig.
